# Supplementary material for: Analysis of the Opsin Repertoire in the Tardigrade Hypsibius dujardini Provides Insights into the Evolution of Opsin Genes in Panarthropoda
Source: PubMed Central journal article supplement — Genome Biol Evol. 2014 Sep 4;6(9):2380–91. doi: 10.1093/gbe/evu193 (PMC4202329; doi:10.1093/gbe/evu193), 2014-09-04
Supplement: supp_evu193_Supplementary_Material_GBE-140723.pdf [file supp_evu193_Supplementary_Material_GBE-140723.pdf]

## **Supplementary Material**

### **Analysis of the Opsin Repertoire in the Tardigrade**

### ***Hypsibius dujardini* Provides Insights into the Evolution of Opsin Genes in Panarthropoda**

**Lars Hering<sup>1,\*</sup>, Georg Mayer<sup>1</sup>**

<sup>1</sup>Animal Evolution and Development, Institute of Biology, University of Leipzig,  
Talstraße 33, D-04103 Leipzig, Germany

\*Author for Correspondence: Lars Hering, Animal Evolution and Development,  
Institute of Biology, University of Leipzig, Talstraße 33, D-04103 Leipzig, Germany,  
+493419736766, lars.hering@uni-leipzig.de

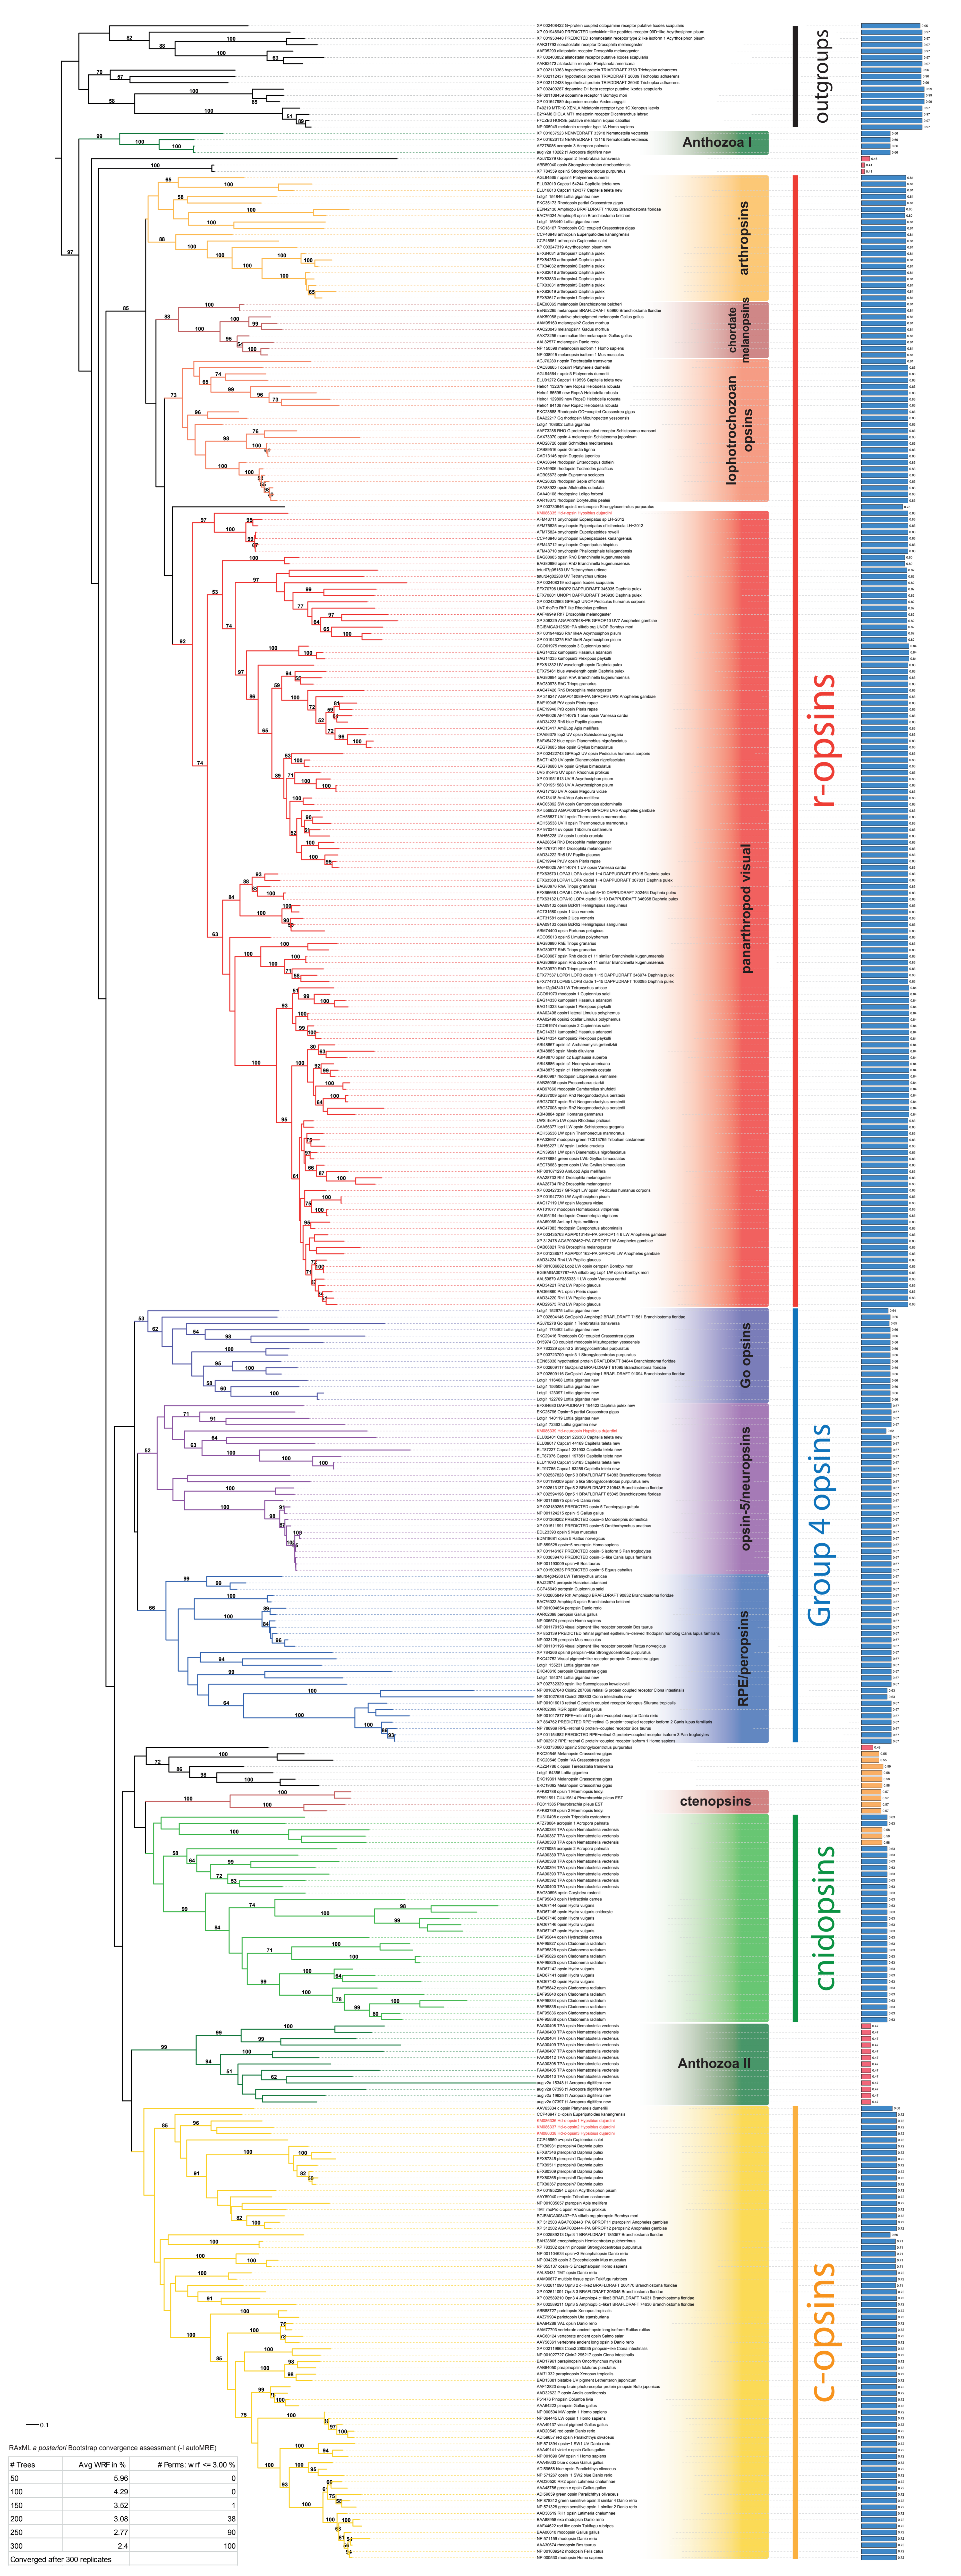

**Figure S1.** Maximum likelihood tree under a dataset-specific GTR+G model of amino acid sequence evolution of 401 opsins and opsin related proteins and the placement of the opsin genes of the tardigrade *Hypsibius dujardini* (highlighted in red). Bootstrap values (from 1,000 pseudoreplicates) > 50% are given at the nodes. According to the bootstrap convergence assessment, a sufficient number of replicates has been generated (table in lower left corner). Group 4 opsins are highlighted in blue. Group 5 opsins are highlighted in yellow. Group 6 opsins are highlighted in orange. Group 7 opsins are highlighted in green. Group 8 opsins are highlighted in purple. Group 9 opsins are highlighted in red. Group 10 opsins are highlighted in light blue. Group 11 opsins are highlighted in dark red. Group 12 opsins are highlighted in orange. Group 13 opsins are highlighted in green. Group 14 opsins are highlighted in purple. Group 15 opsins are highlighted in yellow. Group 16 opsins are highlighted in light blue. Group 17 opsins are highlighted in dark red. Group 18 opsins are highlighted in orange. Group 19 opsins are highlighted in green. Group 20 opsins are highlighted in purple. Group 21 opsins are highlighted in yellow. Group 22 opsins are highlighted in light blue. Group 23 opsins are highlighted in dark red. Group 24 opsins are highlighted in orange. Group 25 opsins are highlighted in green. Group 26 opsins are highlighted in purple. Group 27 opsins are highlighted in yellow. Group 28 opsins are highlighted in light blue. Group 29 opsins are highlighted in dark red. Group 30 opsins are highlighted in orange. Group 31 opsins are highlighted in green. Group 32 opsins are highlighted in purple. Group 33 opsins are highlighted in yellow. Group 34 opsins are highlighted in light blue. Group 35 opsins are highlighted in dark red. Group 36 opsins are highlighted in orange. Group 37 opsins are highlighted in green. Group 38 opsins are highlighted in purple. Group 39 opsins are highlighted in yellow. Group 40 opsins are highlighted in light blue. Group 41 opsins are highlighted in dark red. Group 42 opsins are highlighted in orange. Group 43 opsins are highlighted in green. Group 44 opsins are highlighted in purple. Group 45 opsins are highlighted in yellow. Group 46 opsins are highlighted in light blue. Group 47 opsins are highlighted in dark red. Group 48 opsins are highlighted in orange. Group 49 opsins are highlighted in green. Group 50 opsins are highlighted in purple. Group 51 opsins are highlighted in yellow. Group 52 opsins are highlighted in light blue. Group 53 opsins are highlighted in dark red. Group 54 opsins are highlighted in orange. Group 55 opsins are highlighted in green. Group 56 opsins are highlighted in purple. Group 57 opsins are highlighted in yellow. Group 58 opsins are highlighted in light blue. Group 59 opsins are highlighted in dark red. Group 60 opsins are highlighted in orange. Group 61 opsins are highlighted in green. Group 62 opsins are highlighted in purple. Group 63 opsins are highlighted in yellow. Group 64 opsins are highlighted in light blue. Group 65 opsins are highlighted in dark red. Group 66 opsins are highlighted in orange. Group 67 opsins are highlighted in green. Group 68 opsins are highlighted in purple. Group 69 opsins are highlighted in yellow. Group 70 opsins are highlighted in light blue. Group 71 opsins are highlighted in dark red. Group 72 opsins are highlighted in orange. Group 73 opsins are highlighted in green. Group 74 opsins are highlighted in purple. Group 75 opsins are highlighted in yellow. Group 76 opsins are highlighted in light blue. Group 77 opsins are highlighted in dark red. Group 78 opsins are highlighted in orange. Group 79 opsins are highlighted in green. Group 80 opsins are highlighted in purple. Group 81 opsins are highlighted in yellow. Group 82 opsins are highlighted in light blue. Group 83 opsins are highlighted in dark red. Group 84 opsins are highlighted in orange. Group 85 opsins are highlighted in green. Group 86 opsins are highlighted in purple. Group 87 opsins are highlighted in yellow. Group 88 opsins are highlighted in light blue. Group 89 opsins are highlighted in dark red. Group 90 opsins are highlighted in orange. Group 91 opsins are highlighted in green. Group 92 opsins are highlighted in purple. Group 93 opsins are highlighted in yellow. Group 94 opsins are highlighted in light blue. Group 95 opsins are highlighted in dark red. Group 96 opsins are highlighted in orange. Group 97 opsins are highlighted in green. Group 98 opsins are highlighted in purple. Group 99 opsins are highlighted in yellow. Group 100 opsins are highlighted in light blue.

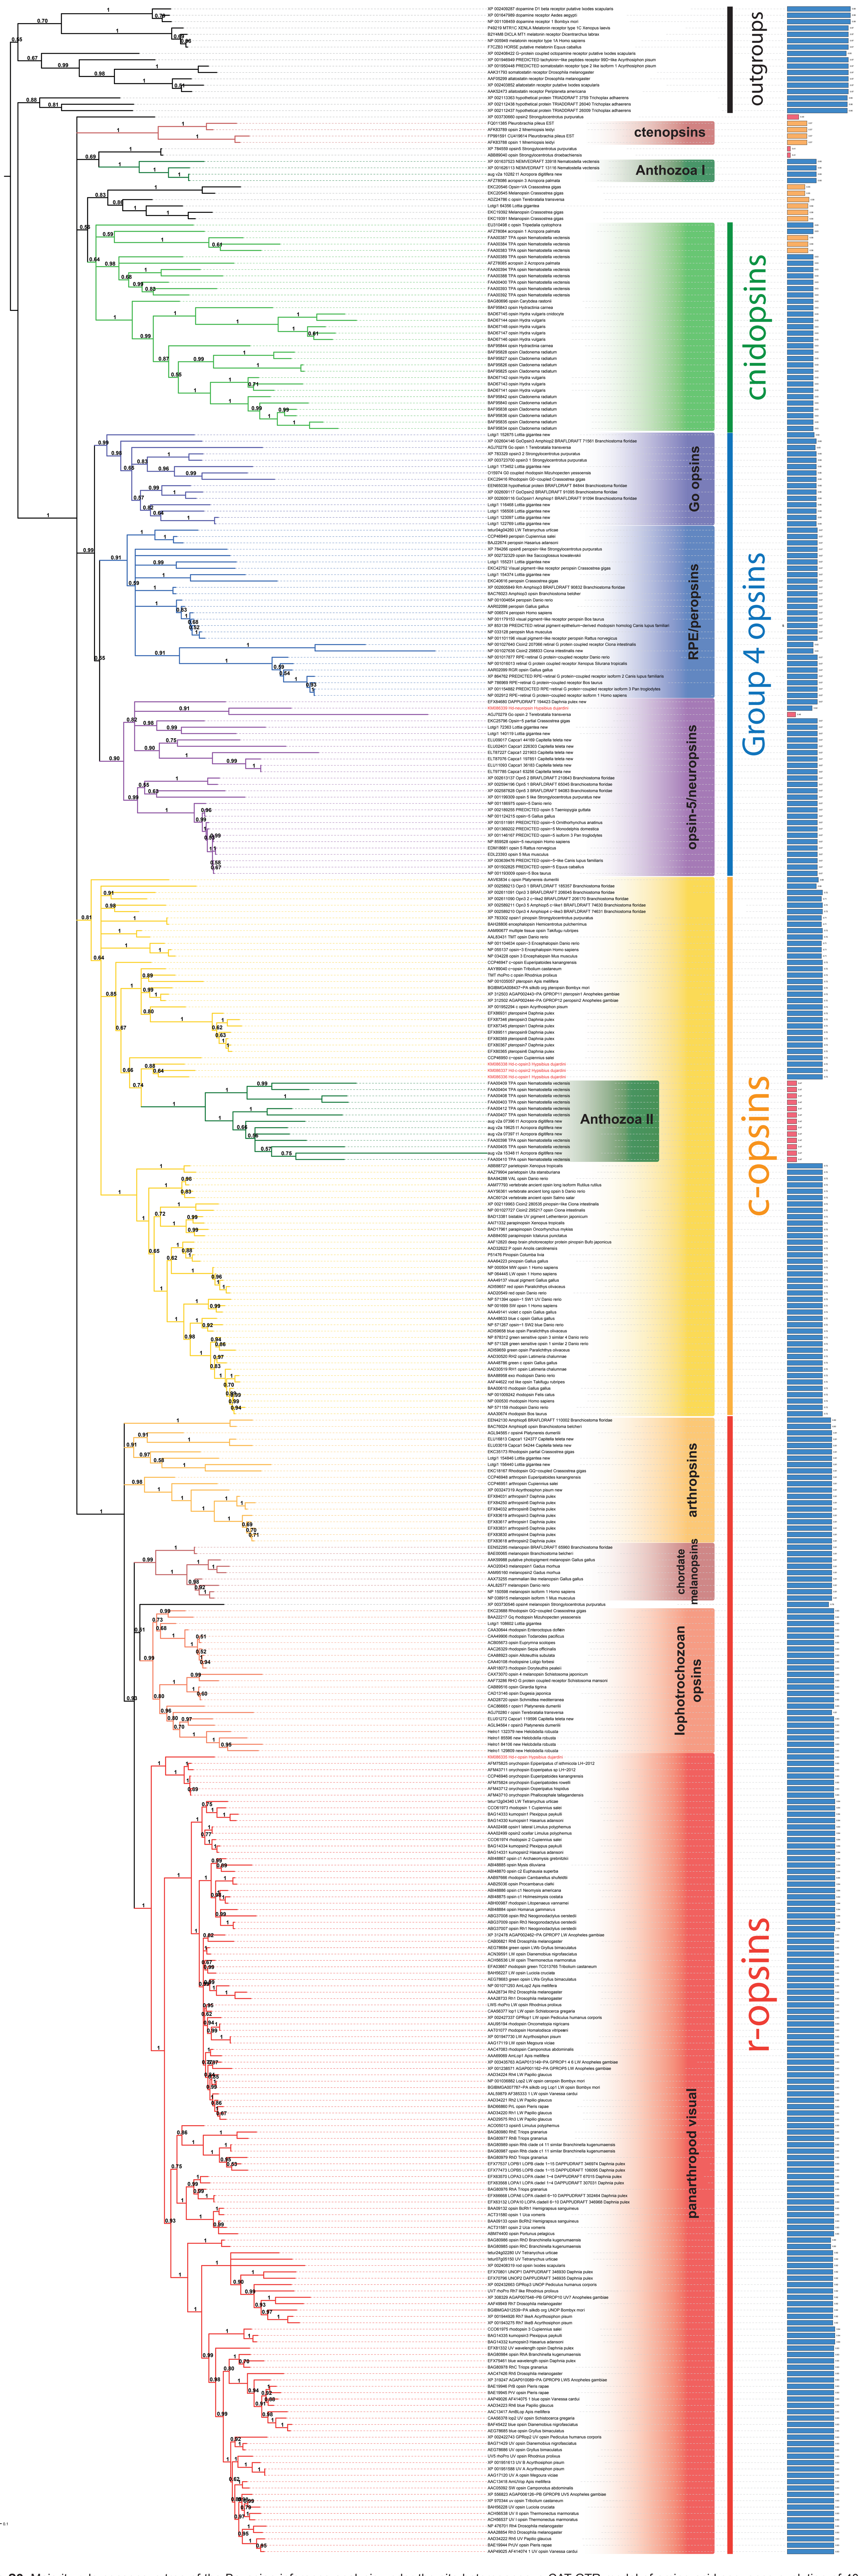

**Figure S2.** Majority-rule consensus tree of the Bayesian inference analysis under the site-heterogeneous CAT-GTR model of amino acid sequence evolution of 401 opsins and opsin related proteins and the placement of the opsin genes of the tardigrade *Hypsibius avaraimi* (highlighted in red). Posterior probabilities > 0.70 are given at the nodes. G-protein-coupled receptor sequences other than opsins were used as outgroups. Bars on the right indicate the leaf stability indices derived from 1,000 ML bootstrapping trees (red: LS ≤ 0.50, orange: 0.60 ≤ LS < 0.70, blue: LS > 0.70). Scale bar indicates the number of substitutions per site.

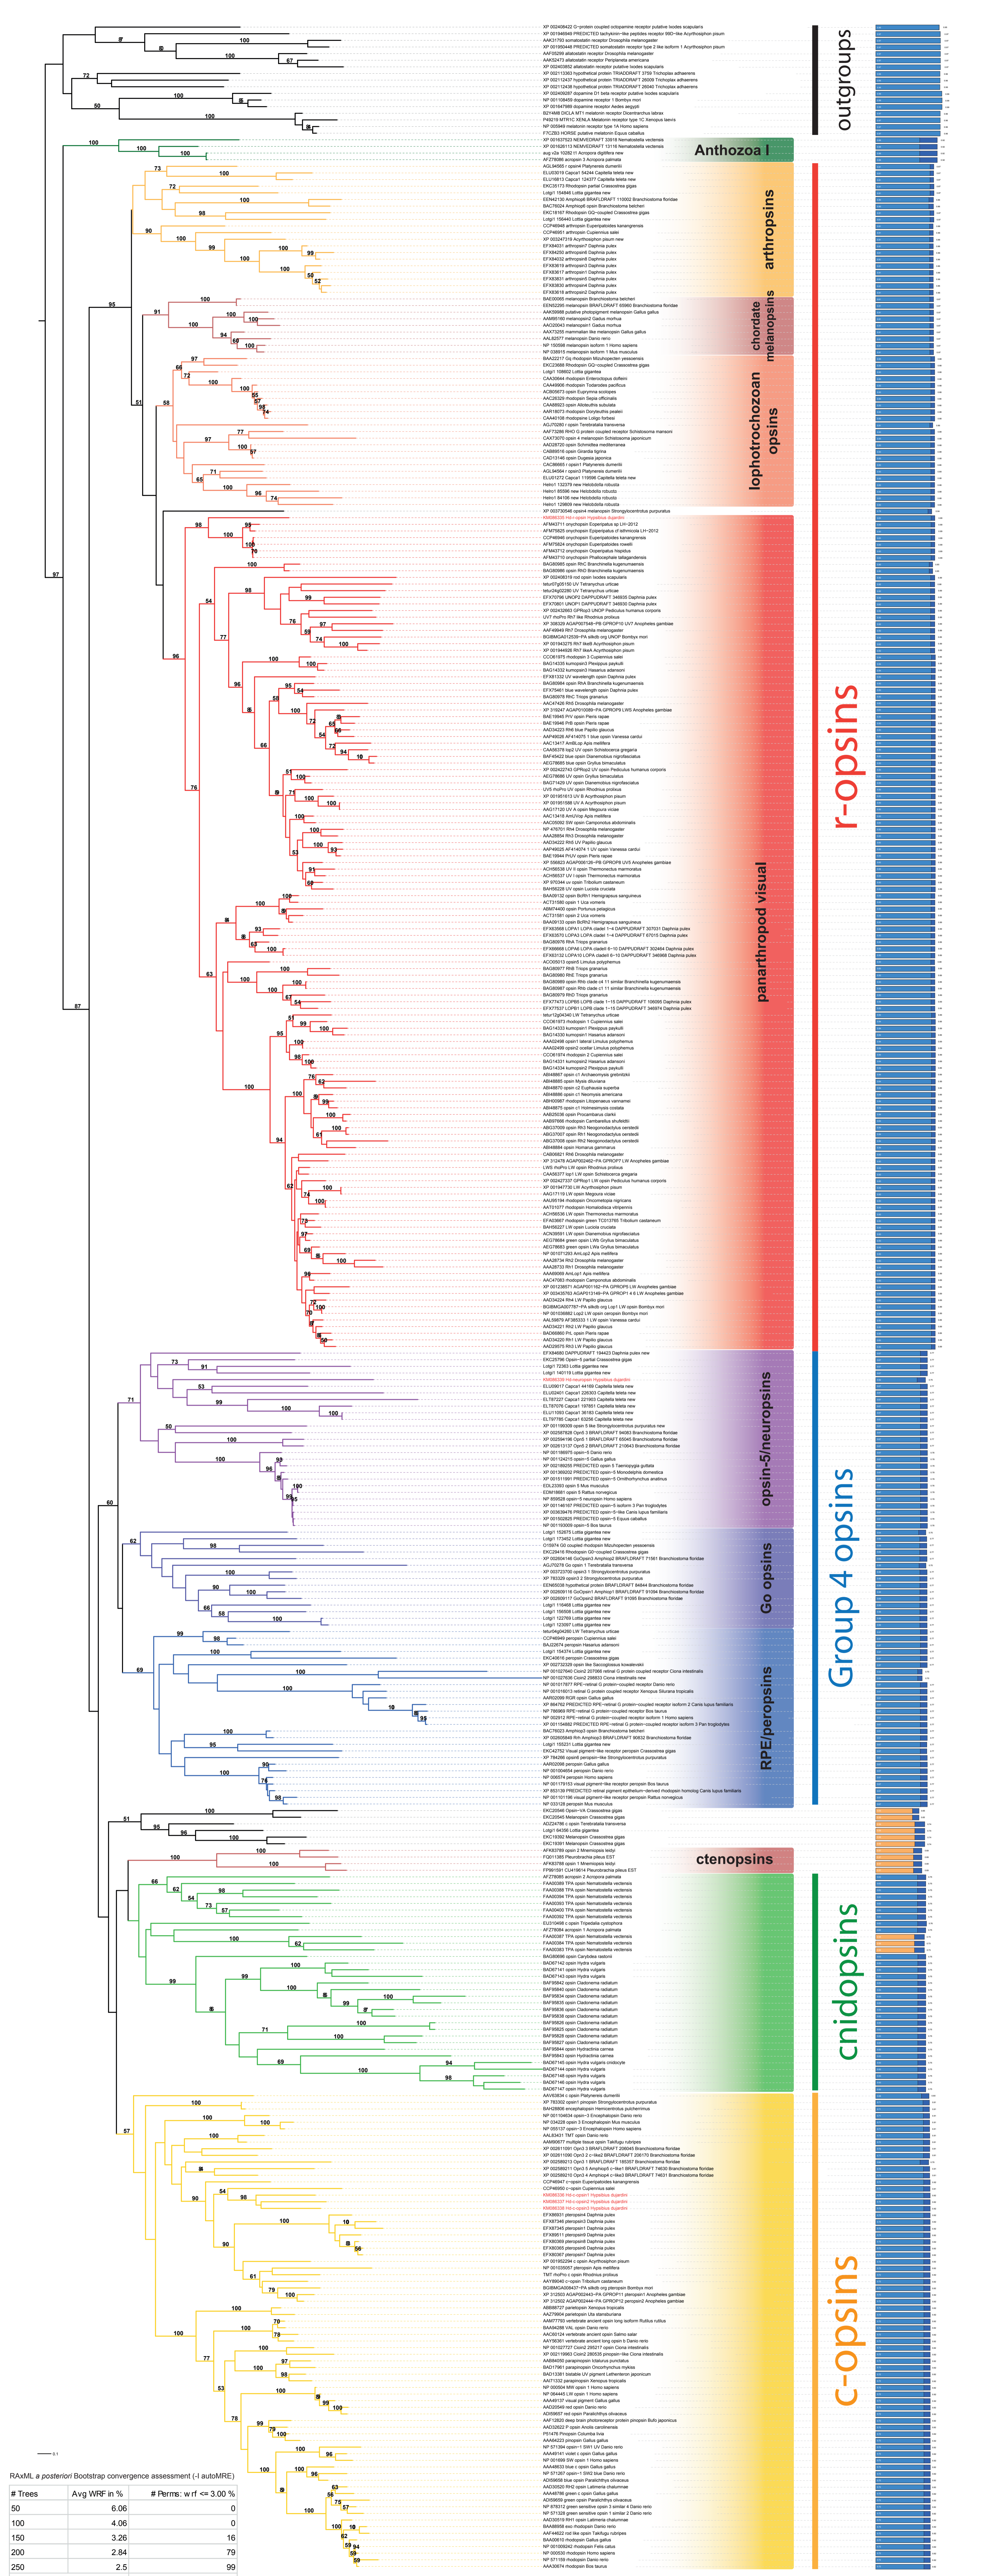

**Figure S3.** Maximum likelihood tree under a dataset-specific GTR+G model of amino acid sequence evolution of the pruned dataset LS50 (excluded taxa with leaf stability  $\leq 0.50$ ) and the maximum likelihood tree of the tardigrade *Hypsibius djardini* (highlighted in red). Bootstrap values (from 1,000 pseudoreplicates) > 50% are given at the nodes. According to the bootstrap convergence assessment, a sufficient number of replicates has been generated (table in lower left corner). G-protein-coupled receptor sequences other than opsins were used as outgroups. Bars on the right indicate the leaf stability indices derived from 1,000 ML bootstrapping trees on the full dataset (orange:  $LS \leq 0.60$ , light blue:  $LS > 0.60$ ) and from 1,000 ML bootstrapping trees after pruning of taxa with  $LS \leq 0.50$  (dark blue). Scale bar indicates the number of substitutions per site.

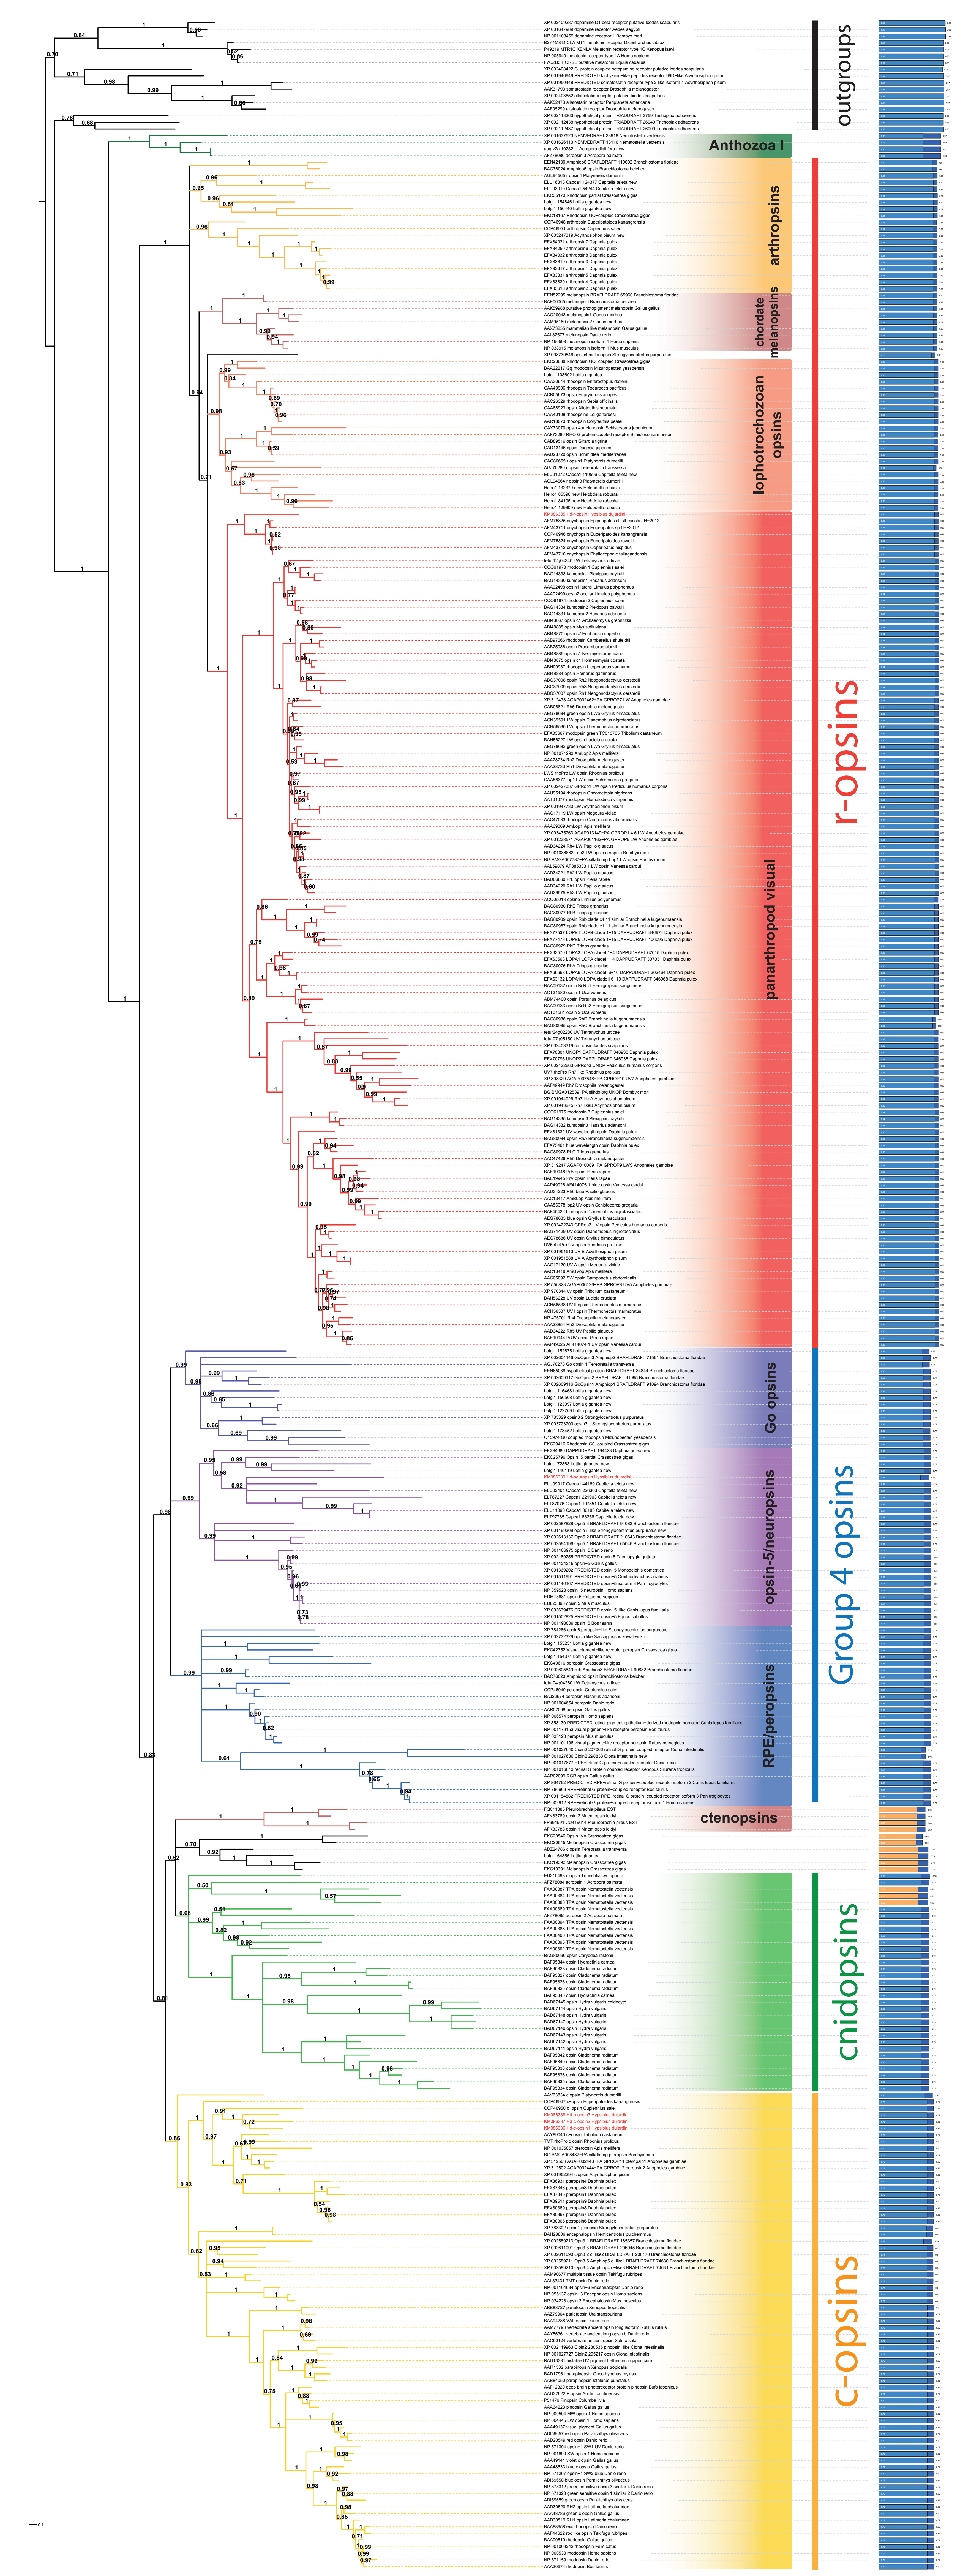

**Figure S4.** Majority-rule consensus tree of the Bayesian inference analysis under the site-heterogeneous CAT-GTR model of amino acid sequence evolution of the pruned dataset LS50 (excluded taxa with leaf stability  $\leq 0.50$ ) and the placement of the opsin genes of the tardigrade *Hypsibius dujardini* (highlighted in red). Posterior probabilities  $> 0.70$  are given at the nodes. G-protein-coupled receptor sequences other than opsins were used as outgroups. Bars on the right indicate the leaf stability indices derived from 1,000 ML bootstrapping trees on the full dataset (orange:  $LS \leq 0.60$ , light blue:  $LS > 0.60$ ) and from 1,000 ML bootstrapping trees after pruning of taxa with  $LS \leq 0.50$  (dark blue). Scale bar indicates the number of substitutions per site.



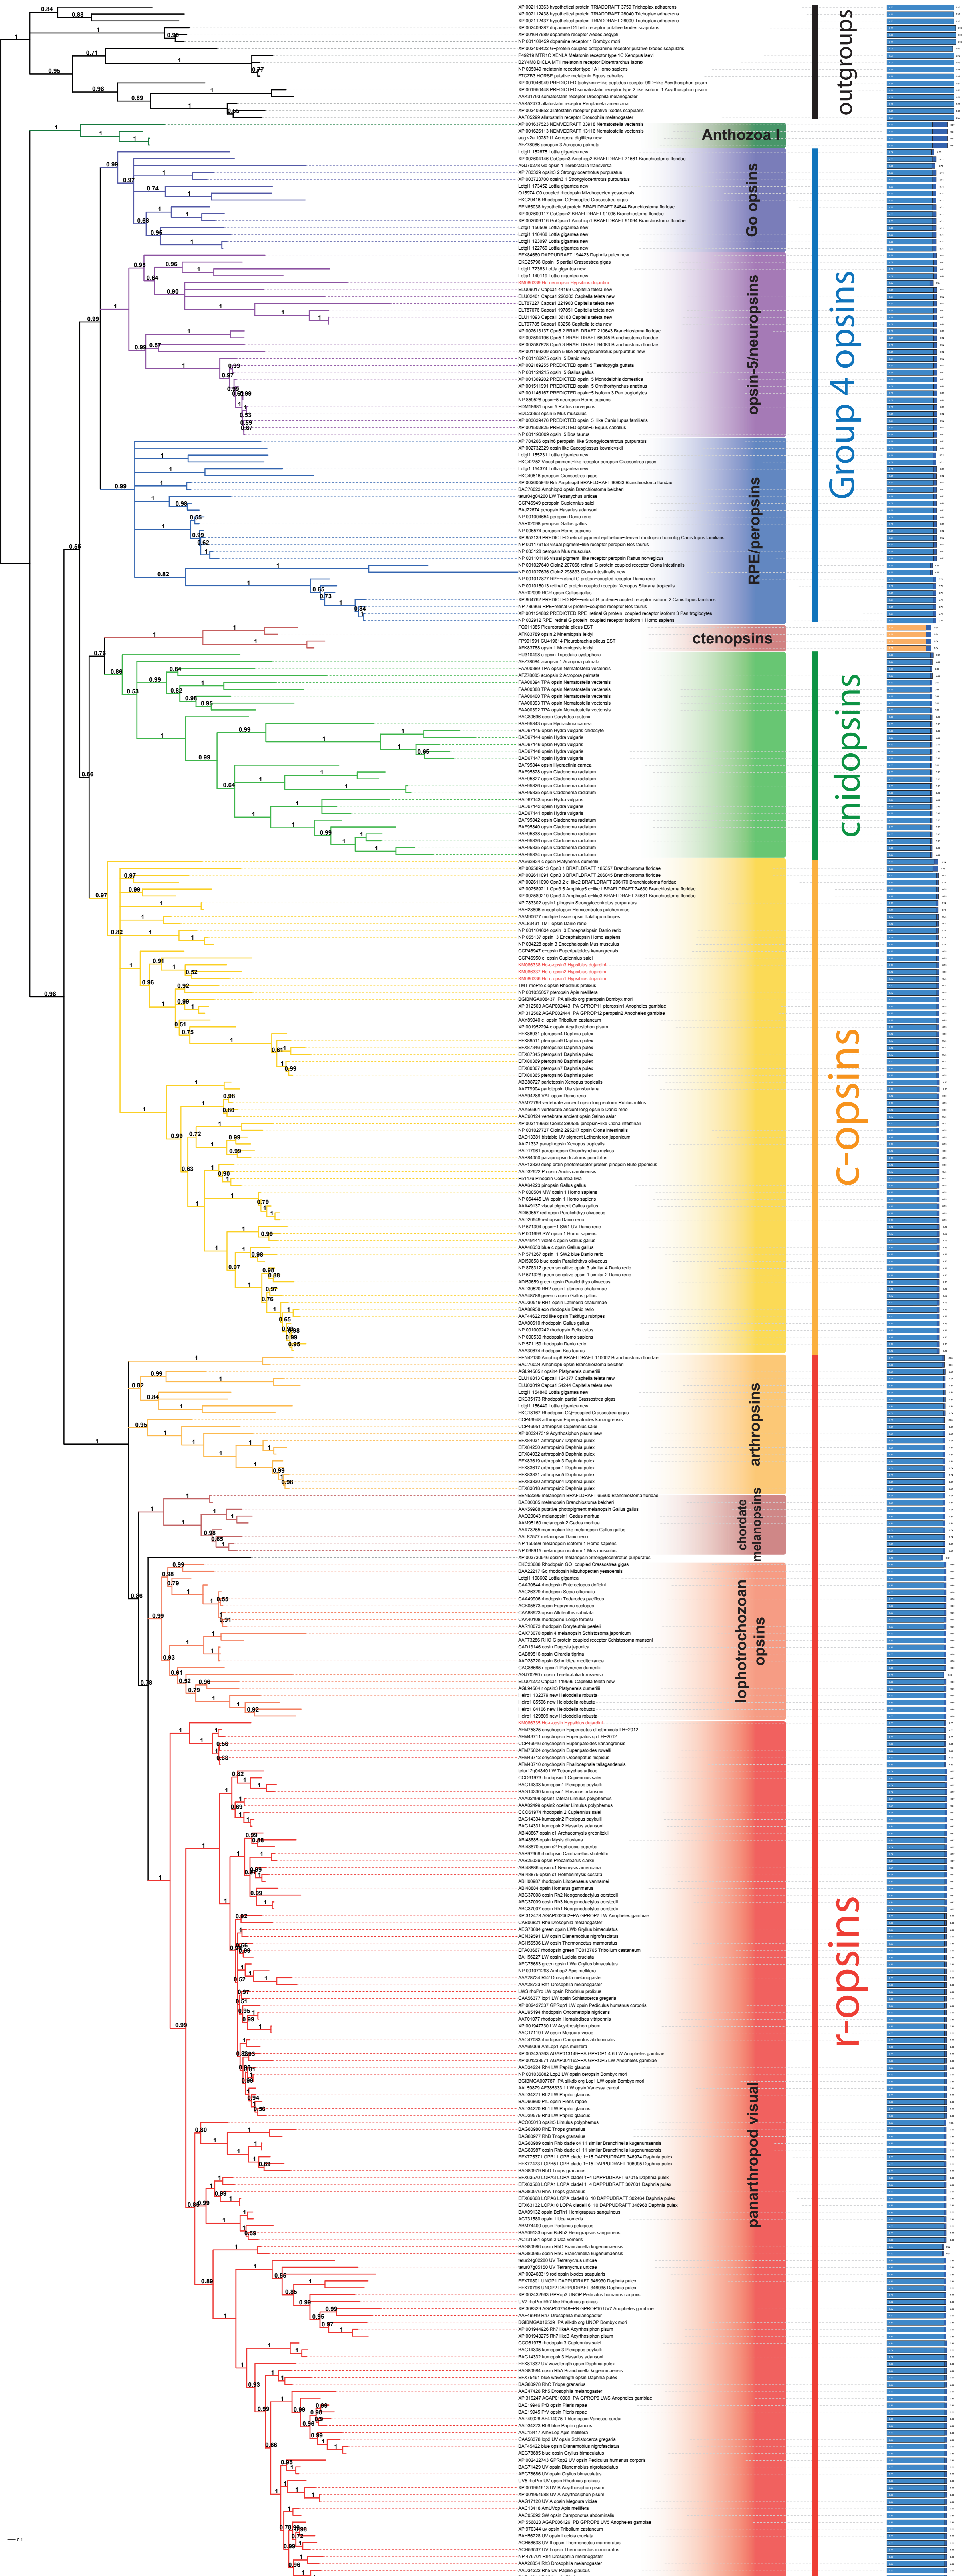

**Figure S6.** Majority-rule consensus of the Bayesian analysis under the site-heterogeneous CAT-GTR model of amino acid sequence evolution of the protein dataset LS60 (excluded taxa with leaf stability  $\leq 0.60$ ) and the placement of the opsin genes of the tardigrade *Hypsibius dujardini* (highlighted in red). Posterior probabilities  $> 0.70$  are given at the nodes. G-protein-coupled receptor sequences other than opsins were used as outgroups. Bars on the right indicate the leaf stability indices derived from 1,000 ML bootstrapping trees on the full dataset (orange:  $LS \leq 0.60$ , light blue:  $LS > 0.60$ ) and from 1,000 ML bootstrapping trees after pruning of taxa with  $LS \leq 0.60$  (dark blue). Scale bar indicates the number of substitutions per site.

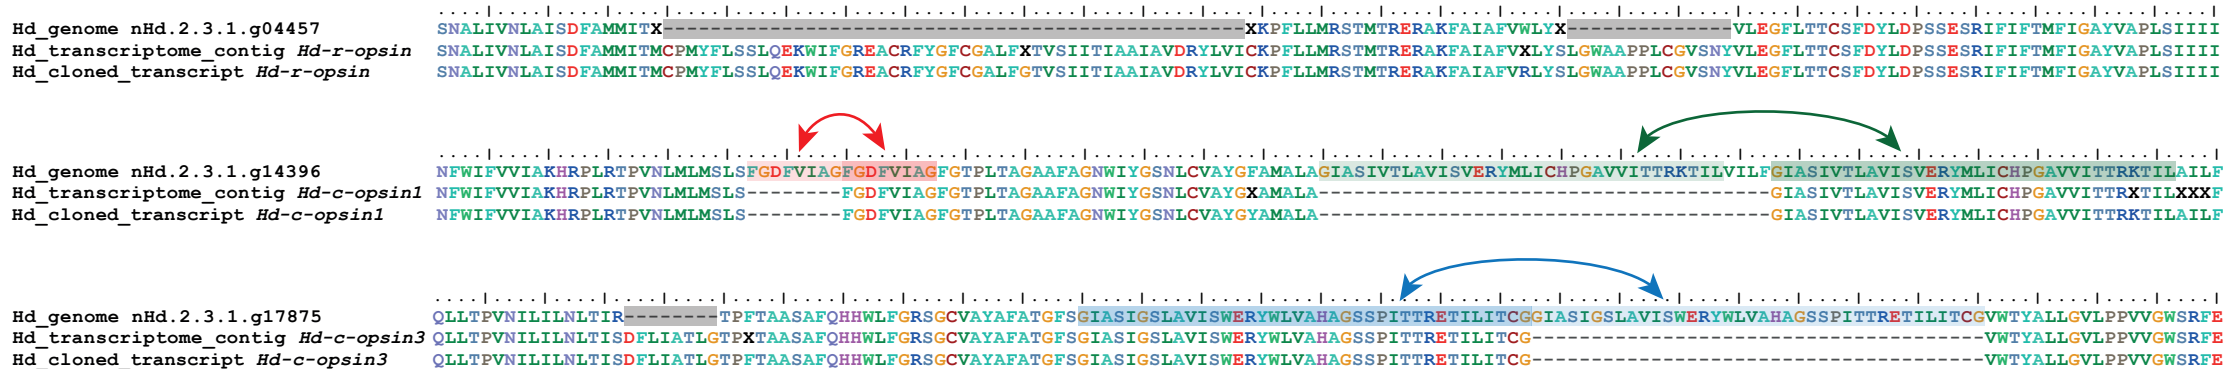

**Figure S7.** Three examples for inconsistencies between our cloned transcripts and the predicted transcripts from the genome of *Hypsibius dujardini*. Sequences from the genome are on top of each alignment. Apparently exonic regions are either missing (grey boxes) or duplicated (colored boxes). Arrows indicate corresponding repeats. This suggests that either the genomic contigs and/or scaffolds were assembled incorrectly or, if the assembly was correct and the introns indeed contain such repeated exonic sequences, the actual splice sites were predicted incorrectly during the gene annotation process.







A

|                  |          | good      |           |           | acceptable |           |           |           |           |           |           |           |           |           |           |           | bad       |           |           |           |           |           |           |           |           |           |           |           |           |           |
|------------------|----------|-----------|-----------|-----------|------------|-----------|-----------|-----------|-----------|-----------|-----------|-----------|-----------|-----------|-----------|-----------|-----------|-----------|-----------|-----------|-----------|-----------|-----------|-----------|-----------|-----------|-----------|-----------|-----------|-----------|
|                  |          | 1000      | 2000      | 3000      | 4000       | 5000      | 6000      | 7000      | 8000      | 9000      | 10000     | 11000     | 12000     | 13000     | 14000     | 15000     | 16000     | 17000     | 18000     | 19000     | 20000     | 21000     | 22000     | 23000     | 24000     | 25000     | 26000     | 27000     | 28000     | 29000     |
| <i>bpcomp</i>    | burn-in  |           |           |           |            |           |           |           |           |           |           |           |           |           |           |           |           |           |           |           |           |           |           |           |           |           |           |           |           |           |
|                  | maxdiff  | 0.227586  | 0.246071  | 0.254815  | 0.254615   | 0.2684    | 0.291667  | 0.326957  | 0.347273  | 0.350476  | 0.3475    | 0.351053  | 0.348889  | 0.330588  | 0.31375   | 0.27      | 0.269286  | 0.294615  | 0.289167  | 0.299091  | 0.303     | 0.371111  | 0.3875    | 0.335714  | 0.345     | 0.414     | 0.5175    | 0.686667  | 1         | 1         |
|                  | meandiff | 0.0104511 | 0.0108685 | 0.0110605 | 0.0111366  | 0.0112798 | 0.0115507 | 0.0116361 | 0.0119561 | 0.0122573 | 0.0122976 | 0.0127027 | 0.0124553 | 0.0122332 | 0.0127888 | 0.013156  | 0.0133335 | 0.0138974 | 0.0141828 | 0.0145487 | 0.0152713 | 0.0161897 | 0.0163555 | 0.0172672 | 0.0179059 | 0.0199917 | 0.0223186 | 0.0260841 | 0.0271345 | 0.0344127 |
| <i>tracecomp</i> | loglik   |           |           |           |            |           |           |           |           |           |           |           |           |           |           |           |           |           |           |           |           |           |           |           |           |           |           |           |           |           |
|                  | effsize  | 14        | 16        | 17        | 18         | 20        | 20        | 20        | 21        | 21        | 23        | 28        | 28        | 37        | 45        | 49        | 66        | 75        | 135       | 114       | 128       | 4505      | 786       | 314       | 78        | 53        | 149       | 104       | 1013      | 24        |
|                  | rel_diff | 0.0237819 | 0.0320142 | 0.0073386 | 0.010538   | 0.0255308 | 0.0146867 | 0.0177809 | 0.0200572 | 0.0251359 | 0.0398688 | 0.0831141 | 0.108848  | 0.144892  | 0.132515  | 0.120286  | 0.121249  | 0.107498  | 0.0988783 | 0.0604895 | 0.0355846 | 0.0364018 | 0.0749745 | 0.136808  | 0.239009  | 0.436755  | 0.664787  | 0.582707  | 0.658607  | 0.872734  |
| length           | effsize  | 16        | 16        | 18        | 20         | 24        | 27        | 28        | 27        | 23        | 18        | 16        | 15        | 15        | 16        | 20        | 26        | 82        | 190       | 512       | 167       | 204       | 139       | 45        | 24        | 11        | 12        | 14        | 17        | 31        |
|                  | rel_diff | 0.59494   | 0.555494  | 0.489466  | 0.413552   | 0.329719  | 0.243072  | 0.164827  | 0.0597252 | 0.0200417 | 0.105142  | 0.104941  | 0.106852  | 0.0383206 | 0.0699563 | 0.207181  | 0.23078   | 0.216472  | 0.203566  | 0.0686059 | 0.149484  | 0.24305   | 0.249832  | 0.219007  | 0.312343  | 0.512441  | 0.514247  | 0.758884  | 0.993322  | 2.30998   |
| alpha            | effsize  | 53        | 41        | 35        | 33         | 33        | 32        | 28        | 24        | 22        | 21        | 22        | 24        | 35        | 90        | 163       | 588       | 550       | 290       | 170       | 104       | 144       | 55        | 64        | 34        | 18        | 15        | 15        | 22        | 16        |
|                  | rel_diff | 0.12267   | 0.108048  | 0.092388  | 0.0560424  | 0.0010899 | 0.0729768 | 0.137979  | 0.205846  | 0.230726  | 0.252406  | 0.220637  | 0.205472  | 0.148581  | 0.0638998 | 0.052673  | 0.0374147 | 0.0596116 | 0.0648472 | 0.136254  | 0.211651  | 0.353363  | 0.47467   | 0.494006  | 0.509218  | 0.579304  | 0.63402   | 0.650666  | 1.34864   | 1.90301   |
| Nmode            | effsize  | 228       | 302       | 249       | 229        | 194       | 164       | 174       | 160       | 133       | 120       | 102       | 98        | 71        | 64        | 60        | 50        | 43        | 38        | 30        | 29        | 26        | 21        | 17        | 15        | 13        | 30        | 105       | 45        | 70        |
|                  | rel_diff | 0.062392  | 0.0322627 | 0.004876  | 0.0203364  | 0.0218474 | 0.0029722 | 0.0386522 | 0.053204  | 0.0345625 | 0.0645703 | 0.102909  | 0.107747  | 0.107272  | 0.066812  | 0.0823712 | 0.0863115 | 0.0905955 | 0.0554393 | 0.0074636 | 0.120675  | 0.219382  | 0.20732   | 0.110389  | 0.0598444 | 0.134983  | 0.0737169 | 0.131529  | 0.254452  | 0.294139  |
| statent          | effsize  | 177       | 143       | 126       | 111        | 96        | 76        | 68        | 56        | 50        | 52        | 57        | 61        | 74        | 81        | 111       | 99        | 80        | 85        | 84        | 99        | 91        | 103       | 117       | 69        | 92        | 54        | 42        | 42        | 47        |
|                  | rel_diff | 0.0069321 | 0.0131955 | 0.0254085 | 0.030594   | 0.0267037 | 0.0139304 | 0.0058153 | 0.0238568 | 0.0254698 | 0.0061962 | 0.0470645 | 0.0866865 | 0.142818  | 0.180217  | 0.251579  | 0.349704  | 0.375596  | 0.364787  | 0.307754  | 0.201912  | 0.174011  | 0.0816814 | 0.0017654 | 0.0092998 | 0.0859938 | 0.26313   | 0.165437  | 0.402805  | 0.914176  |
| statalpha        | effsize  | 165       | 173       | 180       | 181        | 181       | 187       | 186       | 172       | 187       | 173       | 172       | 161       | 165       | 217       | 205       | 177       | 143       | 107       | 100       | 97        | 121       | 443       | 199       | 125       | 62        | 52        | 106       | 158       | 165       |
|                  | rel_diff | 0.198715  | 0.229603  | 0.24966   | 0.27       | 0.287918  | 0.309947  | 0.330729  | 0.329187  | 0.351968  | 0.360207  | 0.374682  | 0.432911  | 0.473093  | 0.509202  | 0.497247  | 0.495631  | 0.52686   | 0.553188  | 0.588172  | 0.621136  | 0.599971  | 0.537581  | 0.430173  | 0.373435  | 0.195902  | 0.0963556 | 0.156394  |           |           |
| rrent            | effsize  | 101       | 107       | 118       | 123        | 122       | 119       | 114       | 112       | 121       | 151       | 163       | 135       | 106       | 70        | 72        | 109       | 176       | 337       | 214       | 365       | 441       | 498       | 360       | 247       | 126       | 159       | 141       | 34        |           |
|                  | rel_diff | 0.0373999 | 0.0194528 | 0.0050169 | 0.0300272  | 0.0468288 | 0.0668202 | 0.0783548 | 0.0877798 | 0.117076  | 0.161445  | 0.179888  | 0.175834  | 0.173662  | 0.176637  | 0.140455  | 0.166859  | 0.173895  | 0.153114  | 0.127956  | 0.171687  | 0.115893  | 0.0349035 | 0.0278022 | 0.0607422 | 0.132688  | 0.174942  | 0.0008221 | 0.204277  | 0.140034  |
| rrmean           | effsize  | 9665      | 7438      | 4845      | 6332       | 6396      | 5523      | 4294      | 3953      | 3596      | 3682      | 2737      | 3884      | 3541      | 2946      | 895       | 2116      | 4004      | 2953      | 3608      | 5646      | 4426      | 2519      | 2457      | 3489      | 1399      | 2127      | 690       | 299       | 326       |
|                  | rel_diff | 0.0409238 | 0.0346827 | 0.0326419 | 0.0365511  | 0.0346441 | 0.0350336 | 0.0385501 | 0.0421432 | 0.0299041 | 0.0386215 | 0.040789  | 0.0241635 | 0.0207875 | 0.0342367 | 0.050845  | 0.0428012 | 0.0305661 | 0.0438794 | 0.0713107 | 0.0848356 | 0.0725597 | 0.103969  | 0.0754991 | 0.0490341 | 0.0222611 | 0.0662515 | 0.0643522 | 0.0017475 | 0.0854575 |

B

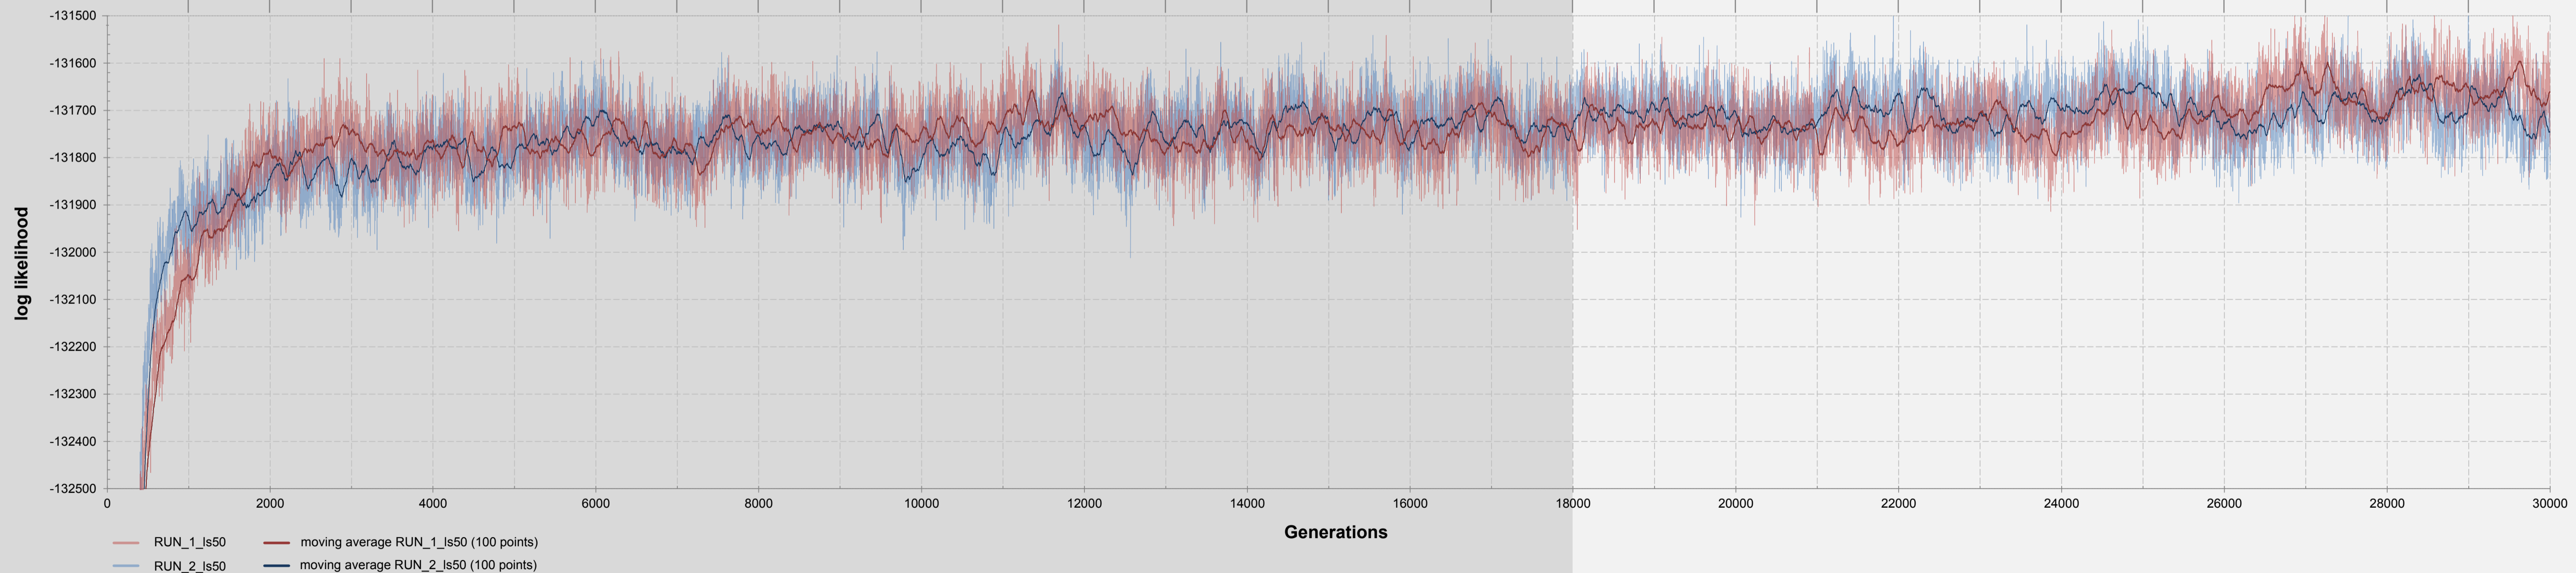

**Figure S10.** Assessment of chain convergence for two independently run Markov chains for 30,000 generations each on the pruned dataset LS50 (excluded taxa with leaf stability $\leq 0.50$ ) using PhyloBayes MPI v1.4f. (A) Obtained summary statistics from the *bpcomp* and *tracecomp* programs of the PhyloBayes package, in dependency on the burn-in. Color coding and assessment for convergence following the guidelines of the PhyloBayes manual (*bpcomp*: maxdiff $< 0.1$ : good run, maxdiff $< 0.3$ : acceptable run,  $0.3 < \text{maxdiff} < 1$ : not converged; *tracecomp*: maxdiff $< 0.1$  and minimum effective size  $> 300$ : good run, maxdiff $< 0.3$  and minimum effective size  $> 50$ : acceptable run). According to this, we decided to discard the first 18,000 trees. (B) Traces of the log-likelihood scores for both chains. The moving average over 100 points is highlighted with a bold line.

A

|                  |          | good      |           |           | acceptable |           |           |           |           |           |           |           |           |           | bad       |           |           |           |           |           |           |           |           |           |           |           |           |           |           |           |
|------------------|----------|-----------|-----------|-----------|------------|-----------|-----------|-----------|-----------|-----------|-----------|-----------|-----------|-----------|-----------|-----------|-----------|-----------|-----------|-----------|-----------|-----------|-----------|-----------|-----------|-----------|-----------|-----------|-----------|-----------|
|                  |          | 1000      | 2000      | 3000      | 4000       | 5000      | 6000      | 7000      | 8000      | 9000      | 10000     | 11000     | 12000     | 13000     | 14000     | 15000     | 16000     | 17000     | 18000     | 19000     | 20000     | 21000     | 22000     | 23000     | 24000     | 25000     | 26000     | 27000     | 28000     | 29000     |
| <i>bpcomp</i>    | burn-in  |           |           |           |            |           |           |           |           |           |           |           |           |           |           |           |           |           |           |           |           |           |           |           |           |           |           |           |           |           |
|                  | maxdiff  | 0.273103  | 0.286071  | 0.282963  | 0.273462   | 0.2528    | 0.255833  | 0.276957  | 0.308182  | 0.295238  | 0.301     | 0.302105  | 0.32      | 0.298235  | 0.28125   | 0.261333  | 0.259286  | 0.262308  | 0.285833  | 0.343636  | 0.419     | 0.393333  | 0.38375   | 0.395714  | 0.416667  | 0.548     | 0.635     | 0.63      | 0.695     | 0.61      |
|                  | meandiff | 0.0104208 | 0.010345  | 0.0103392 | 0.0100695  | 0.0099627 | 0.0101575 | 0.0103081 | 0.0107091 | 0.0107733 | 0.0107825 | 0.0110704 | 0.0111804 | 0.0114978 | 0.0116109 | 0.0118667 | 0.0126462 | 0.013061  | 0.013533  | 0.0143955 | 0.0146153 | 0.0148385 | 0.0142961 | 0.0146444 | 0.014532  | 0.0162662 | 0.0178122 | 0.0190185 | 0.023924  | 0.030145  |
| <i>tracecomp</i> | loglik   |           |           |           |            |           |           |           |           |           |           |           |           |           |           |           |           |           |           |           |           |           |           |           |           |           |           |           |           |           |
|                  | effsize  | 24        | 51        | 114       | 112        | 79        | 67        | 75        | 93        | 114       | 149       | 232       | 201       | 211       | 147       | 129       | 122       | 106       | 104       | 82        | 69        | 72        | 81        | 122       | 164       | 112       | 109       | 142       | 94        | 51        |
|                  | rel_diff | 0.184214  | 0.166074  | 0.188046  | 0.168244   | 0.16248   | 0.145989  | 0.0898268 | 0.0568856 | 0.019022  | 0.0286931 | 0.0787531 | 0.0891936 | 0.149111  | 0.140452  | 0.163347  | 0.175663  | 0.219911  | 0.311178  | 0.348097  | 0.342912  | 0.279317  | 0.210993  | 0.120165  | 0.0413889 | 0.0752186 | 0.0512024 | 0.0255121 | 0.0269953 | 0.145787  |
| length           | effsize  | 33        | 51        | 67        | 99         | 113       | 214       | 409       | 424       | 418       | 354       | 282       | 213       | 143       | 124       | 127       | 107       | 102       | 65        | 54        | 124       | 186       | 138       | 96        | 185       | 296       | 198       | 158       | 189       | 35        |
|                  | rel_diff | 0.164156  | 0.144661  | 0.127026  | 0.103693   | 0.0369844 | 0.0138335 | 0.0048496 | 0.0234175 | 0.036614  | 0.0374792 | 0.0441695 | 0.0593014 | 0.0756194 | 0.0815619 | 0.0588745 | 0.0459217 | 0.0608338 | 0.0093364 | 0.0590438 | 0.0055116 | 0.168803  | 0.300597  | 0.333378  | 0.43381   | 0.552443  | 0.615486  | 0.71837   | 0.581245  | 0.49805   |
| alpha            | effsize  | 239       | 279       | 216       | 250        | 355       | 336       | 312       | 294       | 334       | 600       | 599       | 733       | 463       | 957       | 922       | 944       | 909       | 607       | 643       | 568       | 622       | 481       | 242       | 309       | 212       | 218       | 101       | 200       | 37        |
|                  | rel_diff | 0.0282    | 0.0502729 | 0.0547847 | 0.0831849  | 0.136464  | 0.183251  | 0.185696  | 0.224711  | 0.204626  | 0.186102  | 0.181723  | 0.16157   | 0.188199  | 0.178641  | 0.163819  | 0.157872  | 0.164795  | 0.161847  | 0.132846  | 0.128554  | 0.235925  | 0.237459  | 0.248436  | 0.20398   | 0.184695  | 0.0751227 | 0.073071  | 0.0324482 | 0.149687  |
| Nmode            | effsize  | 113       | 160       | 117       | 113        | 128       | 194       | 273       | 248       | 293       | 305       | 320       | 285       | 288       | 302       | 240       | 173       | 154       | 138       | 103       | 152       | 176       | 296       | 76        | 704       | 152       | 156       | 140       | 51        | 17        |
|                  | rel_diff | 0.597363  | 0.613999  | 0.635983  | 0.620903   | 0.602961  | 0.547335  | 0.485377  | 0.504773  | 0.483825  | 0.469604  | 0.451241  | 0.433558  | 0.383747  | 0.377108  | 0.382375  | 0.384283  | 0.370176  | 0.320008  | 0.277053  | 0.269519  | 0.298231  | 0.252598  | 0.198666  | 0.386053  | 0.448938  | 0.28502   | 0.218981  | 0.151693  | 0.453415  |
| statent          | effsize  | 180       | 184       | 197       | 239        | 207       | 150       | 113       | 145       | 159       | 141       | 151       | 154       | 140       | 107       | 98        | 79        | 95        | 139       | 163       | 159       | 129       | 86        | 121       | 124       | 89        | 58        | 83        | 82        | 405       |
|                  | rel_diff | 0.0467482 | 0.0688978 | 0.0860931 | 0.129296   | 0.15785   | 0.15259   | 0.165663  | 0.186465  | 0.174445  | 0.152293  | 0.1438    | 0.107092  | 0.109953  | 0.150786  | 0.126217  | 0.108946  | 0.0492713 | 0.0196057 | 0.0270609 | 0.028367  | 0.0721641 | 0.11059   | 0.190879  | 0.349064  | 0.398221  | 0.309814  | 0.372268  | 0.197466  | 0.223842  |
| statalpha        | effsize  | 113       | 166       | 168       | 207        | 254       | 248       | 214       | 209       | 202       | 185       | 188       | 184       | 221       | 268       | 392       | 643       | 521       | 804       | 1274      | 1784      | 967       | 544       | 376       | 243       | 192       | 228       | 130       | 151       | 331       |
|                  | rel_diff | 0.0033636 | 0.0314027 | 0.0215591 | 0.0393071  | 0.0657847 | 0.0487873 | 0.0242059 | 0.0184423 | 0.0183207 | 0.0157257 | 0.0045091 | 0.0168283 | 0.0456366 | 0.0584488 | 0.0979399 | 0.127749  | 0.151585  | 0.180957  | 0.224757  | 0.273623  | 0.247258  | 0.233284  | 0.254626  | 0.211922  | 0.196949  | 0.234193  | 0.251174  | 0.230008  | 0.36315   |
| rrent            | effsize  | 151       | 237       | 248       | 239        | 233       | 301       | 331       | 496       | 420       | 305       | 269       | 254       | 191       | 145       | 135       | 143       | 126       | 120       | 108       | 145       | 159       | 149       | 304       | 245       | 2581      | 273       | 182       | 91        | 23        |
|                  | rel_diff | 0.402483  | 0.408422  | 0.407051  | 0.402304   | 0.426692  | 0.394689  | 0.375511  | 0.357681  | 0.356412  | 0.365496  | 0.348028  | 0.31745   | 0.278419  | 0.312449  | 0.299781  | 0.277383  | 0.253492  | 0.239342  | 0.266522  | 0.260839  | 0.225059  | 0.146989  | 0.0363829 | 0.0176078 | 0.127489  | 0.0923387 | 0.0983439 | 0.0127663 | 0.110126  |
| rrmean           | effsize  | 4718      | 3434      | 3354      | 2947       | 4303      | 5325      | 5432      | 3573      | 4055      | 4324      | 3673      | 3173      | 2621      | 2083      | 1705      | 1760      | 1597      | 1227      | 923       | 2800      | 2419      | 2676      | 2380      | 2241      | 2954      | 1975      | 1350      | 387       | 668       |
|                  | rel_diff | 0.0170578 | 0.0243998 | 0.0223627 | 0.0215951  | 0.0096179 | 0.0040289 | 0.0099774 | 0.0159983 | 0.0092217 | 0.0015021 | 0.0011631 | 0.0001285 | 0.0020291 | 0.0174882 | 0.020949  | 0.008826  | 0.0143158 | 0.0136938 | 0.0001887 | 0.0044228 | 0.0421577 | 0.0682639 | 0.0872941 | 0.0834978 | 0.0882393 | 0.0825816 | 0.0548292 | 0.0433859 | 0.0288808 |

B

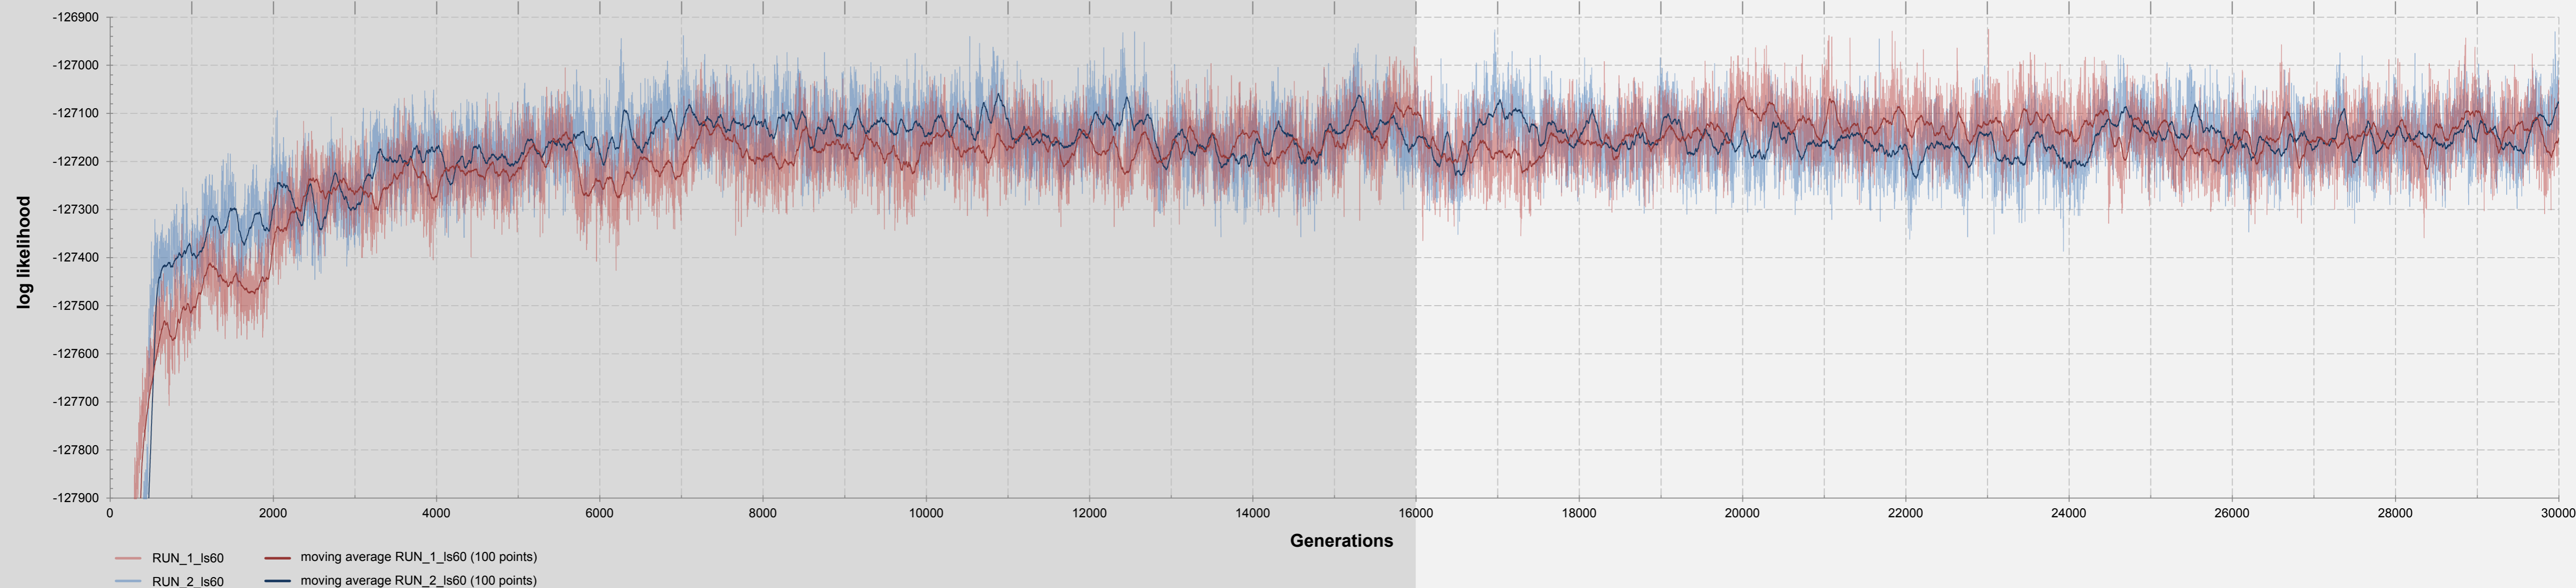

**Figure S11.** Assessment of chain convergence for two independently run Markov chains for 30,000 generations each on the pruned dataset LS60 (excluded taxa with leaf stability $\leq 0.60$ ) using PhyloBayes MPI v1.4f. (A) Obtained summary statistics from the *bpcomp* and *tracecomp* programs of the PhyloBayes package, in dependency on the burn-in. Color coding and assessment for convergence following the guidelines of the PhyloBayes manual (*bpcomp*: maxdiff $< 0.1$ : good run, maxdiff $< 0.3$ : acceptable run,  $0.3 < \text{maxdiff} < 1$ : not converged; *tracecomp*: maxdiff $< 0.1$  and minimum effective size  $> 300$ : good run, maxdiff $< 0.3$  and minimum effective size  $> 50$ : acceptable run). According to this, we decided to discard the first 16,000 trees. (B) Traces of the log-likelihood scores for both chains. The moving average over 100 points is highlighted with a bold line.

**Table S1.** Summary statistics for transcriptome library assemblies using different quality filters and software packages. Filter15: reads with more than five bases below a quality score of 15 were removed; Filter25: reads with less than 20 bases in a row with a quality score of at least 25 were removed; Filter30: reads with less than 20 bases in a row with a quality score of at least 30 were removed. CLC: CLC Genomics Workbench v5.1; IDBA iso1: IDBA-Tran v1.1.0 allowing to retain one isoforms of a transcript; IDBA iso3: IDBA-Tran v1.1.0 allowing to retain three isoforms of a transcript.

| Filter   | Assembler | # reads    | Giga-bases | % reads F15 | # matched reads | % matched reads | # contigs | mean length | max length | total length | N50   |
|----------|-----------|------------|------------|-------------|-----------------|-----------------|-----------|-------------|------------|--------------|-------|
| Filter15 | CLC       | 68,214,238 | 5.18       | 100.0       | 53,993,335      | 79.2            | 33,530    | 791         | 14,105     | 26,518,984   | 1,404 |
|          | IDBA iso1 | 68,214,238 | 5.18       | 100.0       | 39,404,978      | 57.8            | 29,288    | 1,186       | 20,533     | 34,741,313   | 1,858 |
|          | IDBA iso3 | 68,214,238 | 5.18       | 100.0       | 39,323,507      | 57.6            | 44,711    | 1,512       | 20,749     | 67,632,493   | 2,194 |
| Filter25 | CLC       | 42,382,860 | 3.22       | 62.1        | 33,519,856      | 79.1            | 31,386    | 781         | 14,315     | 24,506,359   | 1,354 |
|          | IDBA iso1 | 42,382,860 | 3.22       | 62.1        | 28,467,726      | 67.2            | 26,137    | 1,187       | 15,936     | 31,038,801   | 1,817 |
|          | IDBA iso3 | 42,382,860 | 3.22       | 62.1        | 28,369,455      | 66.9            | 40,516    | 1,496       | 15,936     | 60,614,950   | 2,151 |
| Filter30 | CLC       | 4,590,646  | 0.34       | 6.7         | 3,565,661       | 77.7            | 19,400    | 445         | 5,578      | 8,628,864    | 457   |
|          | IDBA iso1 | 4,590,646  | 0.34       | 6.7         | 2,706,624       | 59.0            | 12,908    | 646         | 6,267      | 8,348,433    | 710   |
|          | IDBA iso3 | 4,590,646  | 0.34       | 6.7         | 2,639,346       | 57.5            | 16,976    | 720         | 7,348      | 12,238,326   | 843   |

**Table S2.** GenBank accession numbers of opsin bait sequences used as BLAST queries.

| Accession      | Type         | Name/Organism                                   |
|----------------|--------------|-------------------------------------------------|
| AFM75824.1     | r-opsin      | onychopsin <i>Euperipatoides rowelli</i>        |
| AAA02499.1     | r-opsin      | opsin <i>Limulus polyphemus</i>                 |
| AAA69069.1     | r-opsin      | long-wavelength rhodopsin <i>Apis mellifera</i> |
| BAG14332.1     | r-opsin      | kumopsin3 <i>Hasarius adansoni</i>              |
| AAC26329.1     | r-opsin      | rhodopsin <i>Sepia officinalis</i>              |
| CAC86665.1     | r-opsin      | rhabdomeric opsin <i>Platynereis dumerilii</i>  |
| EFX83617.1     | r-opsin      | arthropsin1 <i>Daphnia pulex</i>                |
| NP_150598.1    | r-opsin      | melanopsin isoform 1 <i>Homo sapiens</i>        |
| AAV63834.1     | c-opsin      | ciliary opsin <i>Platynereis dumerilii</i>      |
| AAA30674.1     | c-opsin      | rhodopsin <i>Bos taurus</i>                     |
| NP_001138950.1 | c-opsin      | c-opsin <i>Tribolium castaneum</i>              |
| EFX86931.1     | c-opsin      | pteropsin4 <i>Daphnia pulex</i>                 |
| BAC76021.1     | c-opsin      | Amphiop4 <i>Branchiostoma belcheri</i>          |
| BAJ22674.1     | Group4 opsin | peropsin <i>Hasarius adansoni</i>               |
| BAC76019.1     | Group4 opsin | Amphiop1 <i>Branchiostoma belcheri</i>          |
| FAA00384.1     | “cnidopsin”  | TPA: opsin <i>Nematostella vectensis</i>        |

**Table S3.** Bayesian cross-validation test. A 10-fold cross-validation with 10 replicates for each chosen model was performed. The cross-validation log-likelihood scores per model were averaged over the 10 replicates and compared with the reference model (LG). The site-heterogeneous CAT-GTR model fitted the data best in 8 out of the 10 replicates and was therefore used for Bayesian inference analyses. Negative values imply that the reference model (LG) fitted the data better than the tested model.

| <b>models compared</b>  | <b>mean score +/- stdev</b> | <b>#times model is best</b> |
|-------------------------|-----------------------------|-----------------------------|
| C20LG versus LG         | -99.08 +/- 43.68            | 0                           |
| C30LG versus LG         | -71.84 +/- 42.59            | 0                           |
| C40LG versus LG         | -22.32 +/- 46.65            | 0                           |
| WLSR5LG versus LG       | -19.12 +/- 21.10            | 0                           |
| C50LG versus LG         | -11.39 +/- 40.74            | 0                           |
| <b>LG versus LG</b>     | <b>0 +/- 0</b>              | <b>0</b>                    |
| C20GTR versus LG        | 6.51 +/- 60.19              | 0                           |
| <b>GTR versus LG</b>    | <b>28.2 +/- 27.06</b>       | <b>0</b>                    |
| C60LG versus LG         | 28.7 +/- 43.24              | 0                           |
| WLSR5GTR versus LG      | 29.56 +/- 26.38             | 0                           |
| C30GTR versus LG        | 29.58 +/- 56.52             | 0                           |
| C40GTR versus LG        | 34.29 +/- 67.87             | 0                           |
| C50GTR versus LG        | 54.39 +/- 52.22             | 0                           |
| C60GTR versus LG        | 90.97 +/- 50.12             | 0                           |
| CATLG versus LG         | 291.69 +/- 36.69            | 2                           |
| <b>CATGTR versus LG</b> | <b>308.15 +/- 36.85</b>     | <b>8</b>                    |
